# Supplementary material for: A structural color hydrogel for diagnosis of halitosis and screening of periodontitis
Source: Royal Society of Chemistry journal article supplement (doi:10.1039/d3mh01563g), 2023-11-10
Supplement: d3mh01563g1.pdf [file d3mh01563g1.pdf]

## Supplementary Information

### A Structural Color Hydrogel for Diagnosis of Halitosis and Screening of Periodontitis

Chuanshun Hu, Jieyu Zhou, Jin Zhang, Yonghang Zhao, Chunyu Xie, Wei Yin, Jing Xie, Huiying Li, Xin Xu, Lei Zhao, Meng Qin,\* and Jianshu Li\*

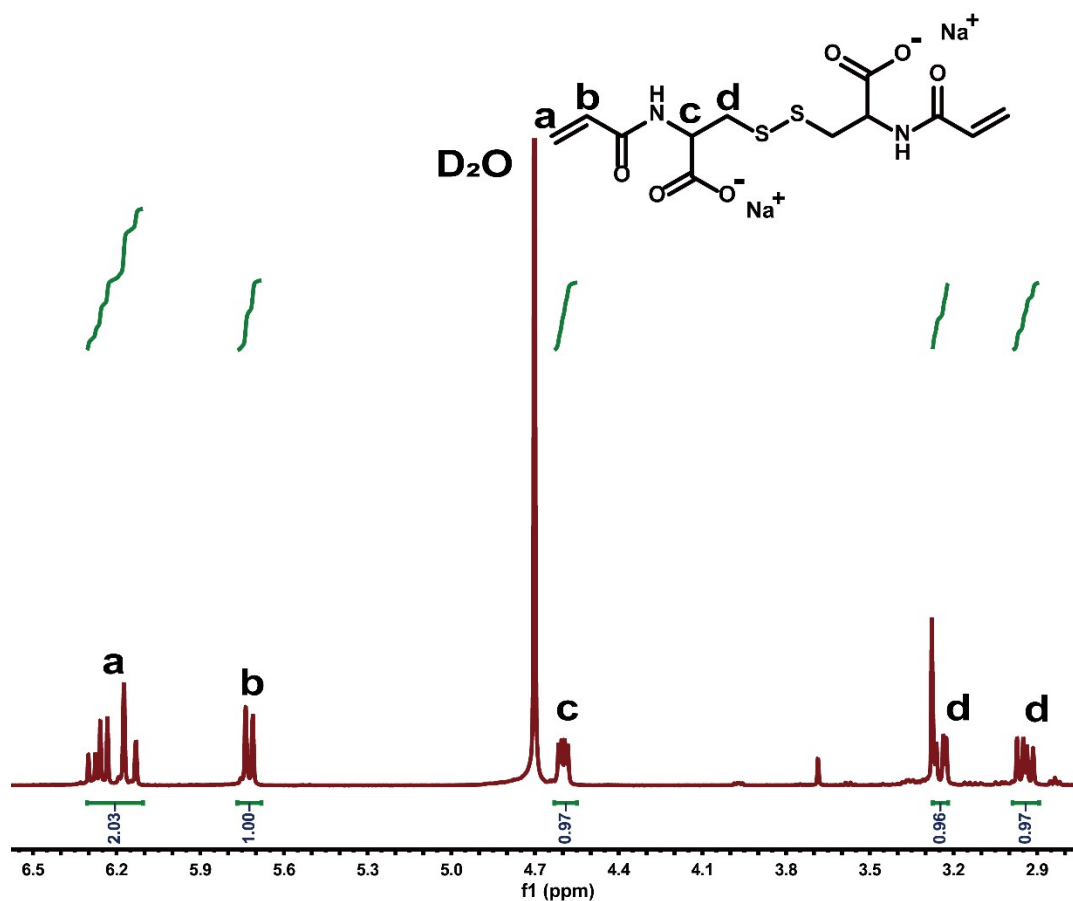

Figure S1.  $^1\text{H}$  NMR (solvent:  $\text{D}_2\text{O}$  400 MHz) spectrum of the disulfide crosslinker BISS.

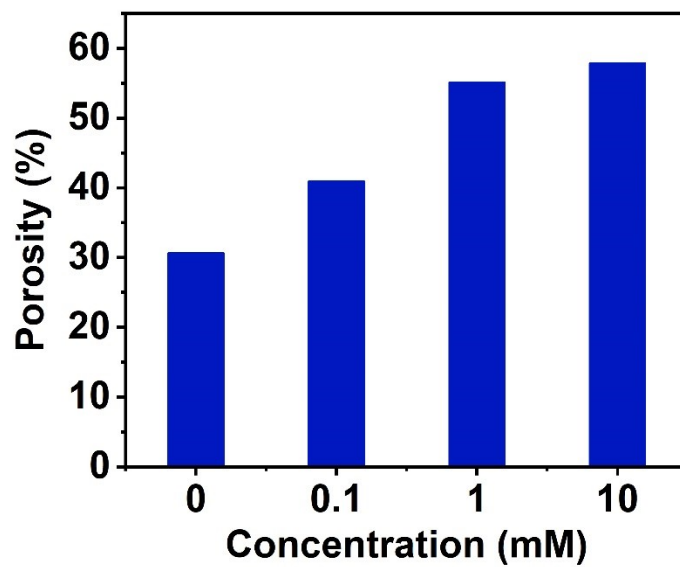

Figure S2. Changes in hydrogel porosity after incubating with different concentrations of Na<sub>2</sub>S solutions.

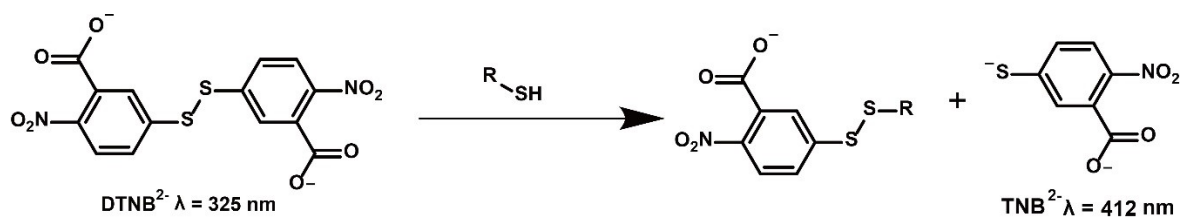

Figure S3. Mechanism of sulfhydryl groups detection with DTNB.

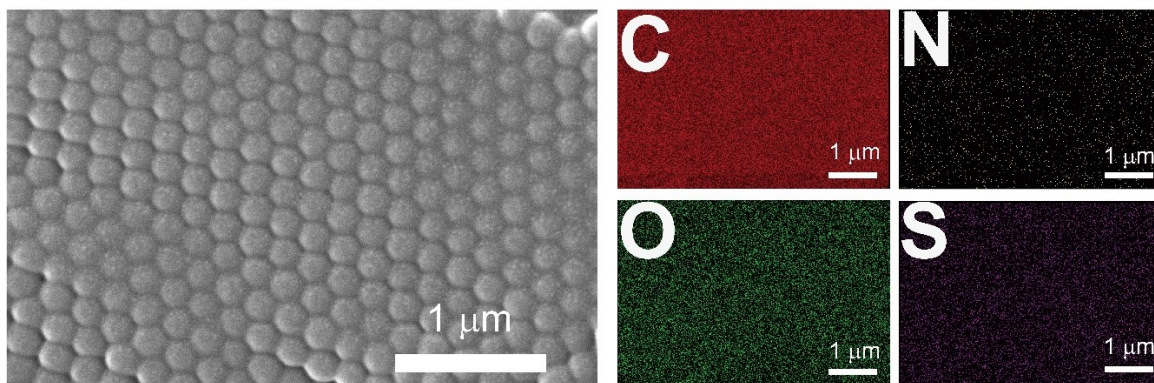

Figure S4. SEM and EDS images of the structural color hydrogels.

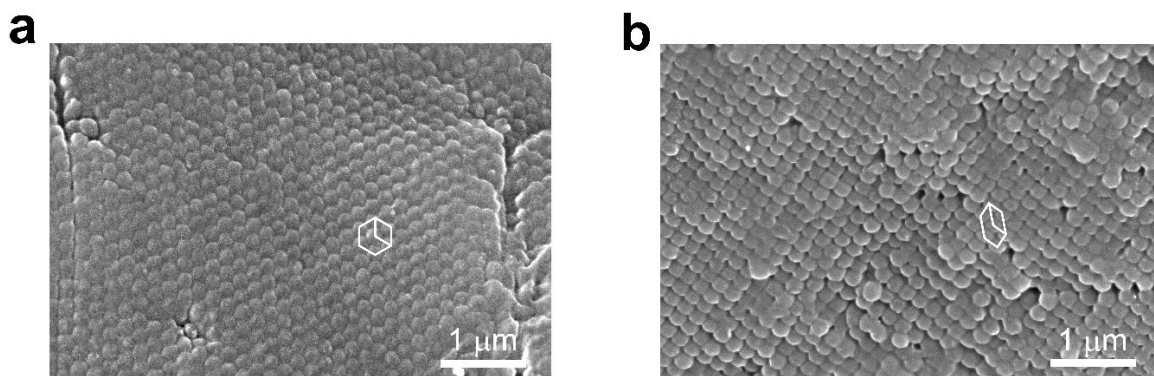

Figure S5. Cross-section images of the structural color hydrogel before (a) and after (b) reduction by  $\text{Na}_2\text{S}$  solution.

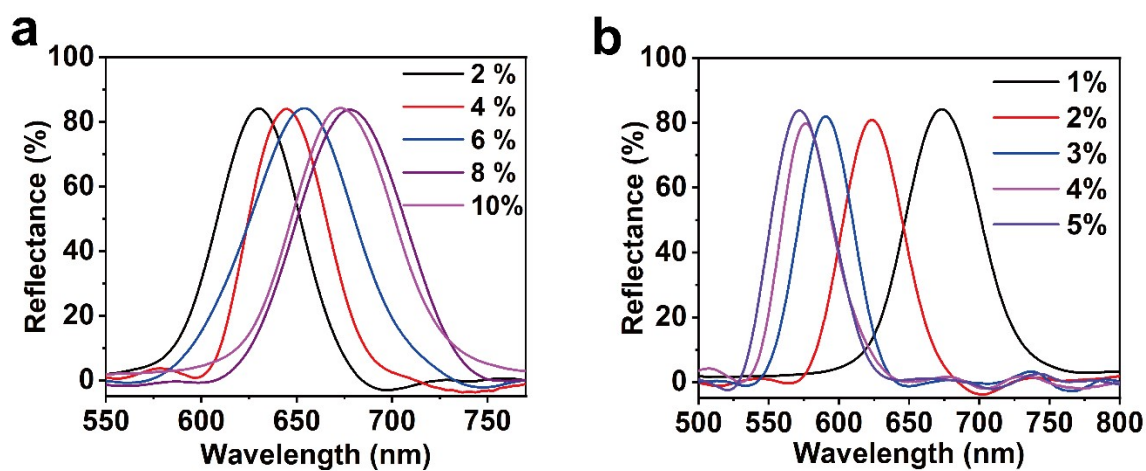

Figure S6. Reflectance spectra of structural color hydrogels with (a) different molar ratios of BISS to AAm and (b) different molar ratios of BIS to AAm.

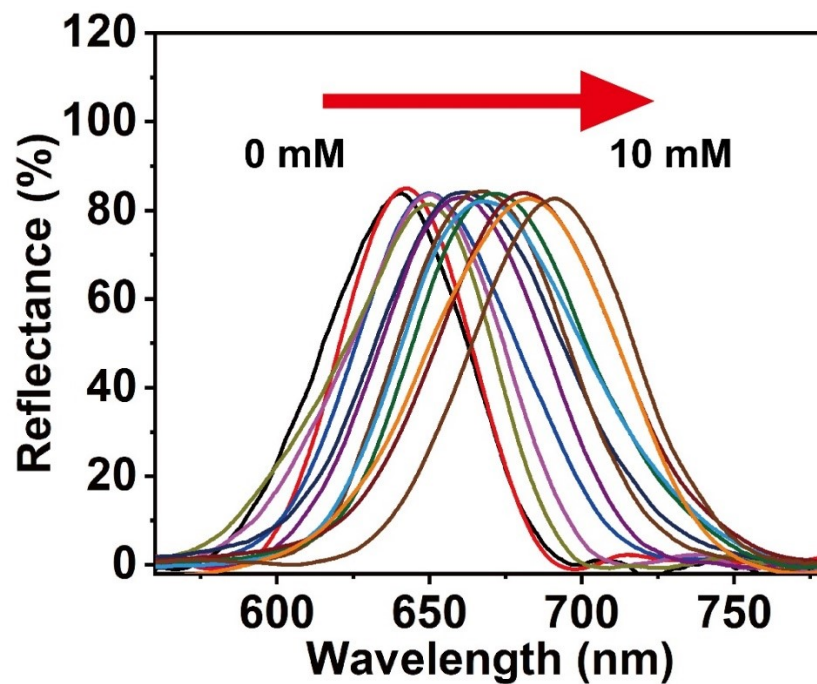

Figure S7. Reflectance spectra of the structural color hydrogel in the presence of different concentrations of  $\text{Na}_2\text{S}$  solutions.

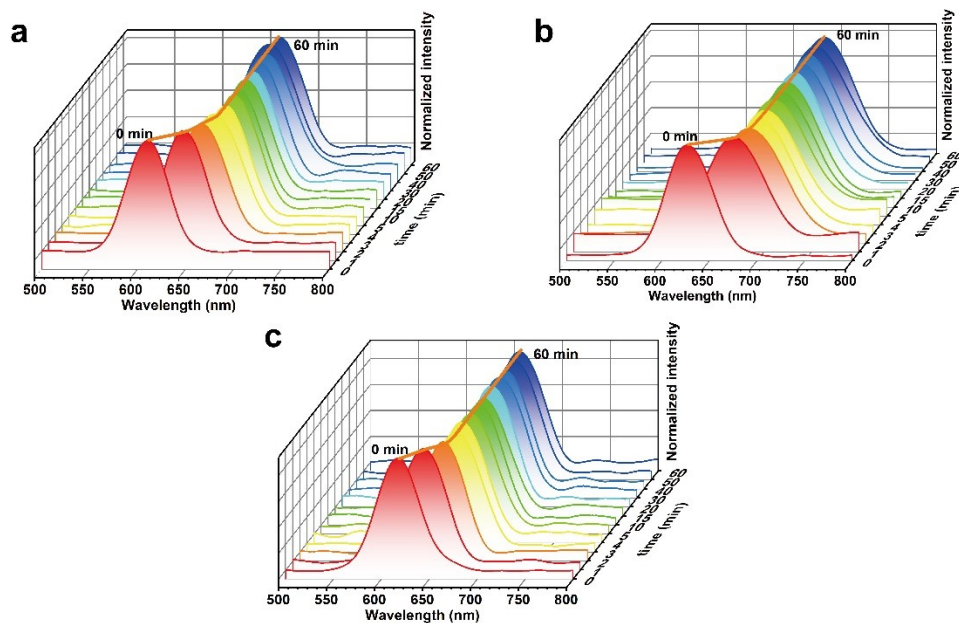

Figure S8. Time-dependent reflectance spectra of the structural color hydrogels responding to varying concentrations of  $\text{Na}_2\text{S}$ . (a) 1.0 mM, (b) 0.5 mM, (c) 0.1 mM.

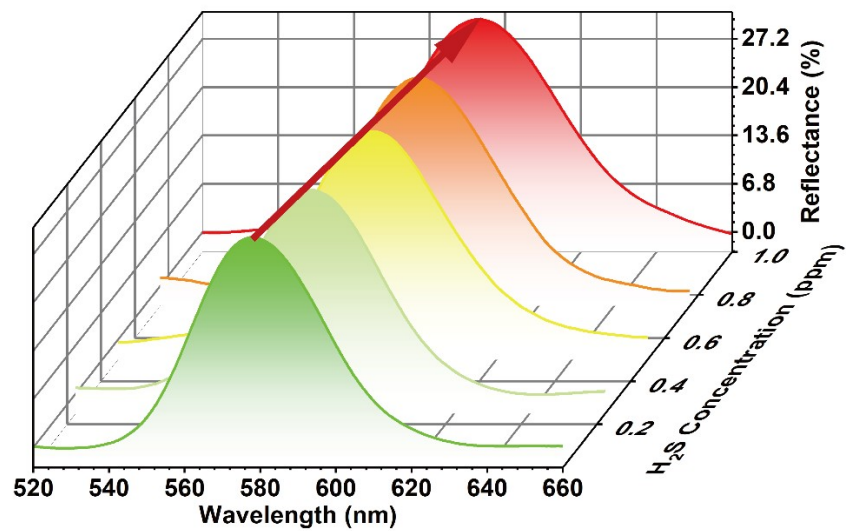

Figure S9. Reflectance spectra of the structural color hydrogel with  $\text{H}_2\text{S}$  concentration increased from 0 to 1 ppm.

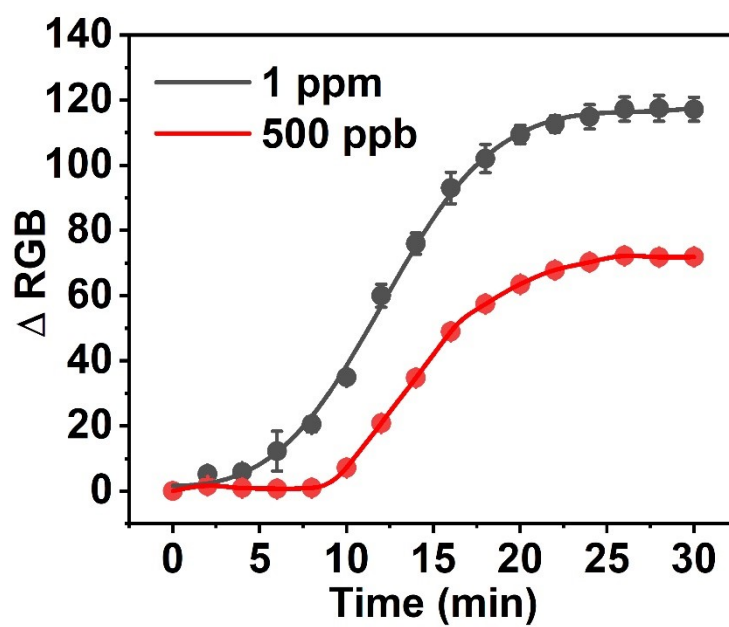

Figure S10. Diffusion kinetics of  $\text{H}_2\text{S}$  in the hydrogel by investigating time-dependent color change of the hydrogel.

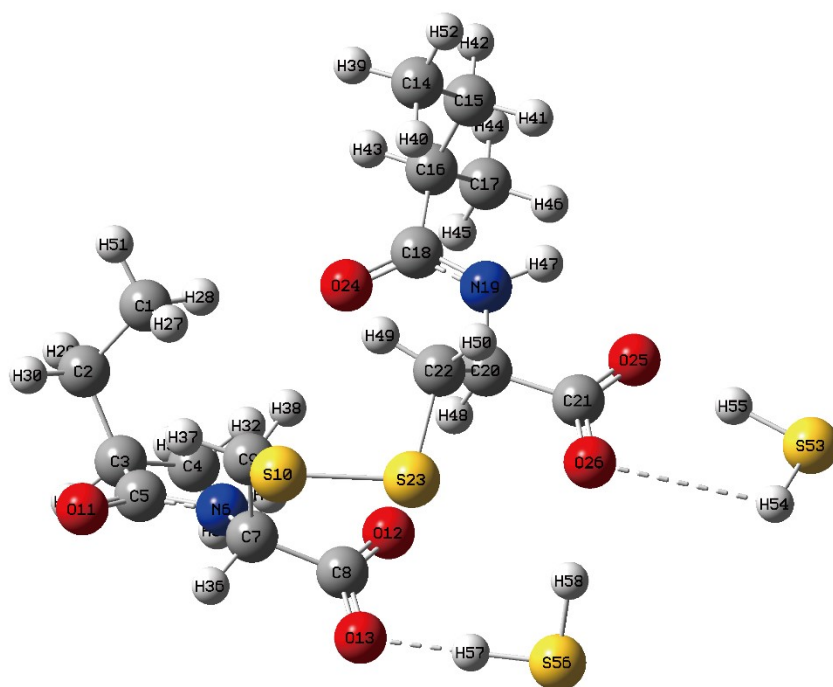

**-19.33 Kcal/mol**

Figure S11. The binding energy between H<sub>2</sub>S and BISS repeating unit. The binding energy is -19.33 Kcal/mol.

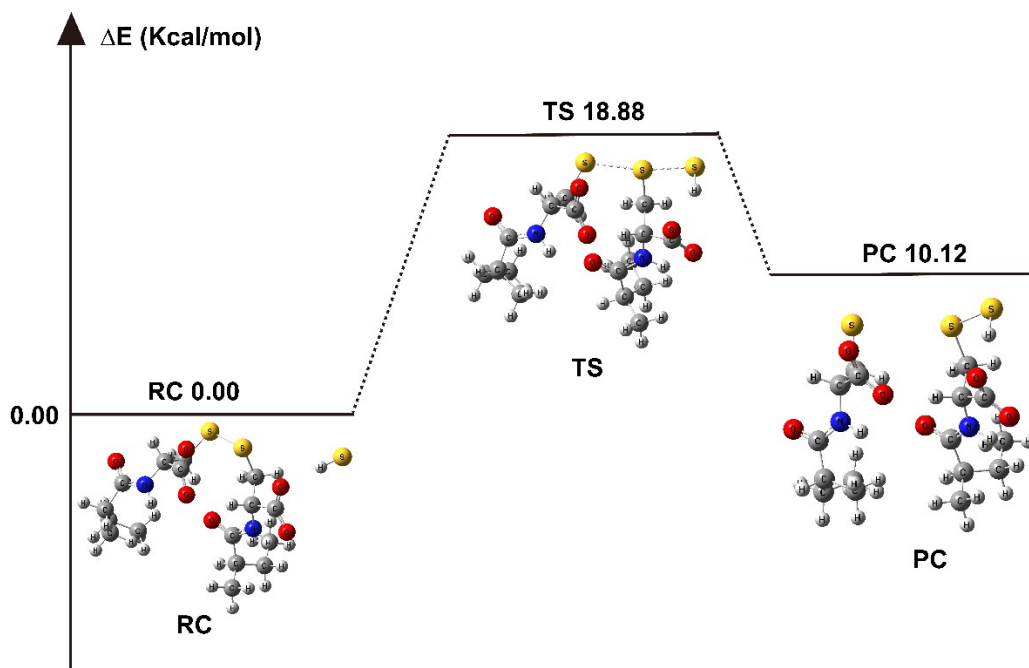

Figure S12. Potential energy profiles of pre-reactive compounds (RC), transition states (TS) and post-reactive compounds (PC) during the reaction between H<sub>2</sub>S and disulfide bonds. The energy barrier for this reaction is 18.88 Kcal/mol.



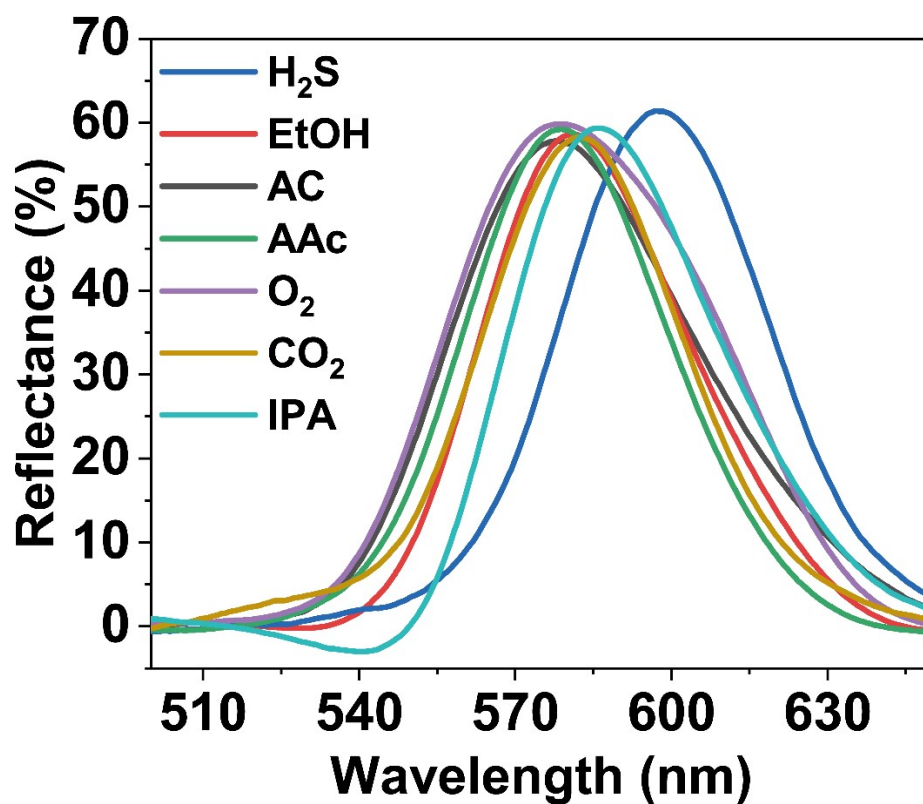

Figure S13. Reflectance spectra of the structural color hydrogel in response to different gases. Gas concentrations are all controlled at 1 ppm.

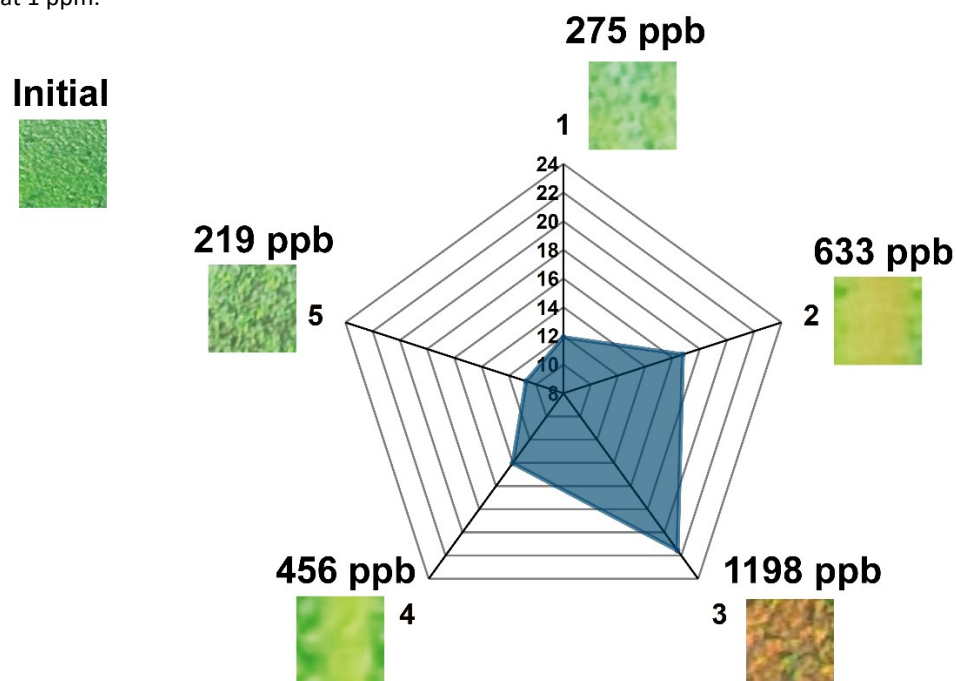

Figure S14. Detection of VSCs in breath samples of patients with halitosis. Radar plot shows the bandgap shift of the structural color hydrogels in response to the samples.

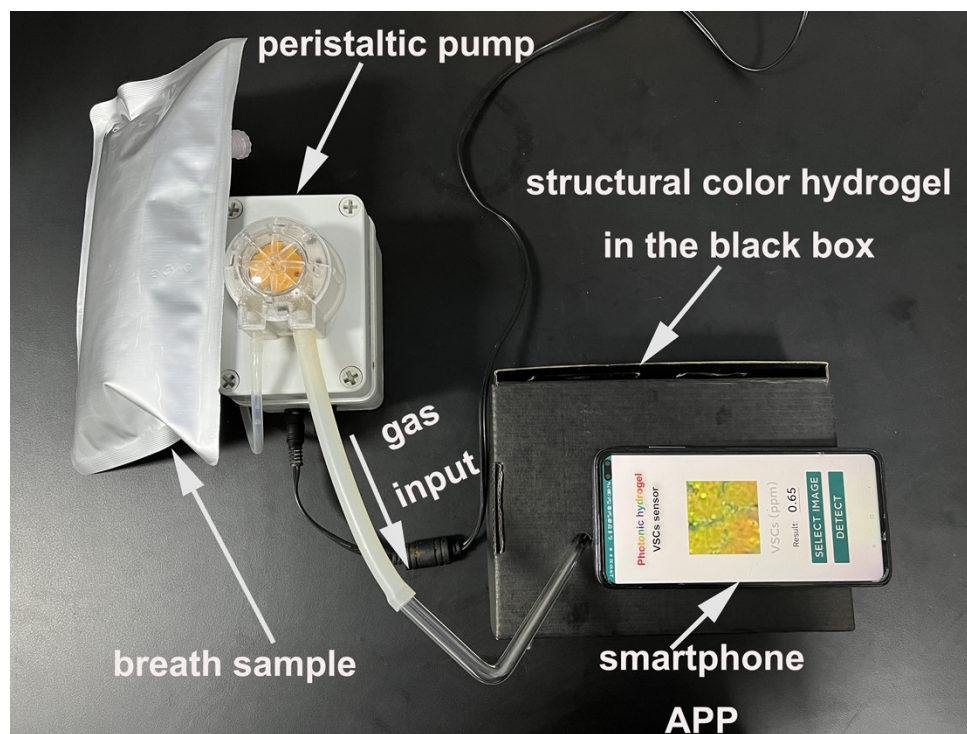

Figure S15. Detection device for smartphone-based detection of VSCs.

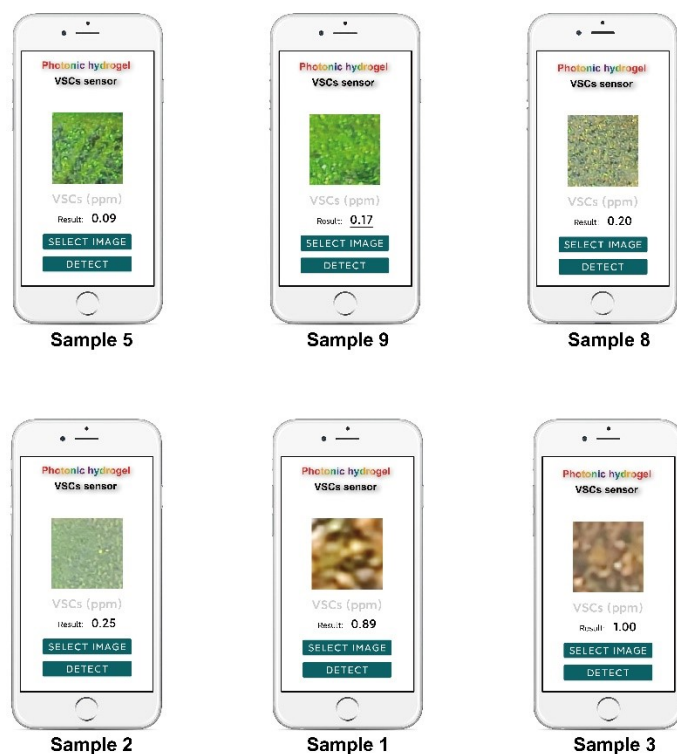

Figure S16. Screenshots of results of detecting VSCs in clinical samples.



Table S1. Quantitative detection of VSCs in clinical samples by the structural color hydrogel. The result is consistent with the clinical diagnosis by the commonly used Halimeter.

| Sample number | Mean bandgap shift | structural color<br>hydrogel test results<br>(ppb) | Halimeter test results (ppb) |
|---------------|--------------------|----------------------------------------------------|------------------------------|
| 1             | 11.91              | 304                                                | 275                          |
| 2             | 16.77              | 698                                                | 633                          |
| 3             | 21.56              | > 1000                                             | 1198                         |
| 4             | 14.03              | 477                                                | 456                          |
| 5             | 10.75              | 210                                                | 219                          |

Table S2. RGB values of the sensor array after responding to clinical samples.

| Sample<br>number | VSCs Concentration<br>(ppb) | S1      |         |         | S2      |         |         | S3      |         |         |
|------------------|-----------------------------|---------|---------|---------|---------|---------|---------|---------|---------|---------|
|                  |                             | R       | G       | B       | R       | G       | B       | R       | G       | B       |
| 1                | 880                         | 227.482 | 142.582 | 92.092  | 134.346 | 173.086 | 179.304 | 152.219 | 141.834 | 156.787 |
| 2                | 225                         | 184.463 | 212.092 | 156.442 | 158.596 | 147.376 | 184.402 | 180.985 | 159.635 | 177.309 |
| 3                | 1231                        | 223.702 | 123.606 | 90.451  | 156.726 | 184.531 | 171.248 | 156.228 | 130.628 | 156.940 |
| 4                | 857                         | 226.589 | 152.338 | 96.998  | 125.280 | 161.313 | 179.812 | 157.941 | 118.374 | 150.415 |
| 5                | 58                          | 167.906 | 223.415 | 140.283 | 135.329 | 156.107 | 175.561 | 207.562 | 152.536 | 161.780 |
| 6                | 684                         | 221.335 | 211.518 | 138.529 | 115.260 | 113.731 | 208.808 | 161.324 | 133.368 | 100.576 |
| 7                | 223                         | 186.920 | 213.510 | 164.280 | 164.089 | 143.217 | 190.759 | 185.384 | 154.277 | 171.292 |
| 8                | 209                         | 148.544 | 222.143 | 167.171 | 166.017 | 151.383 | 180.456 | 184.726 | 153.702 | 170.953 |
| 9                | 120                         | 145.854 | 221.215 | 130.487 | 149.241 | 159.022 | 170.845 | 183.017 | 158.034 | 168.427 |

Table S3. Eigenvalues, percentage of variance and cumulative obtained through PCA.

| Principal Component<br>Number | Eigenvalue | Percentage of Variance (%) | Cumulative (%) |
|-------------------------------|------------|----------------------------|----------------|
| 1                             | 4.78652    | 53.1836                    | 53.1836        |
| 2                             | 2.86274    | 31.80819                   | 84.9918        |
| 3                             | 0.70691    | 7.85458                    | 92.84638       |
| 4                             | 0.24717    | 2.74638                    | 95.59276       |
| 5                             | 0.18505    | 2.05616                    | 97.64891       |
| 6                             | 0.10686    | 1.18739                    | 98.8363        |
| 7                             | 0.06212    | 0.69017                    | 99.52647       |
| 8                             | 0.02893    | 0.3215                     | 99.84797       |
| 9                             | 0.01368    | 0.15203                    | 100            |
